# Supplementary material for: High-purity hydrogen production from real biomass pyrolysis vapors via a chemical looping process
Source: Royal Society of Chemistry journal article supplement (doi:10.1039/d2se01635d), 2023-01-01
Supplement: d2se01635d1.pdf [file d2se01635d1.pdf]

*Supplementary material*

High purity hydrogen production from real biomass pyrolysis  
vapors via chemical looping process

Zixiang Gao <sup>a</sup>, Dewang Zeng <sup>a</sup>, Qingfeng Kong <sup>a</sup>, Shiliang Wu <sup>a</sup>, Shaojun Ren <sup>a</sup>, Fu Zhou <sup>b</sup>, Ming

Gao <sup>c</sup>, Feng Song <sup>c</sup>, Yunfei Zhai <sup>c</sup>, Rui Xiao <sup>a,\*</sup>

<sup>a</sup> Key Laboratory of Energy Thermal Conversion and Control of Ministry of Education, School of Energy and Environment, Southeast University, Nanjing 210096, PR China

<sup>b</sup> East China Electric Power Test and Research Institute of China Datang Group Science and Technology Research Institute Co., Ltd, Hefei 230088, PR China

<sup>c</sup> Ma'anshan Dangtu Power Generation Co., Ltd, Ma'anshan 243102, PR China

---

\* Corresponding author: ruixiao@seu.edu.cn (R. Xiao).

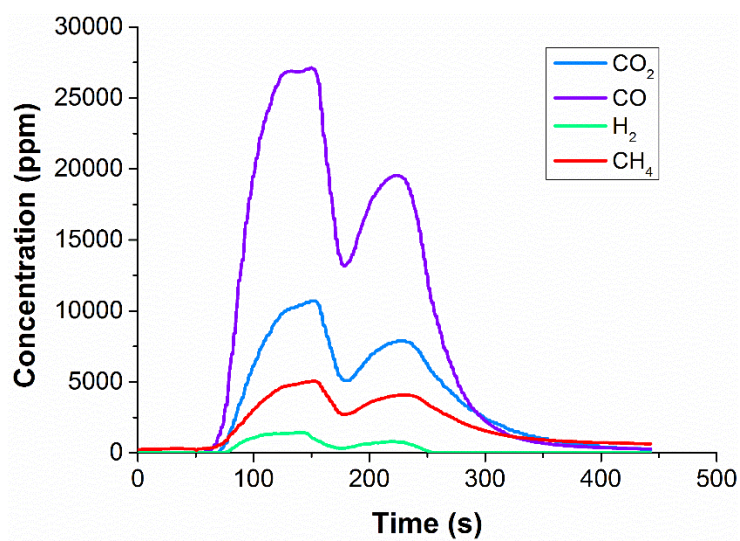

(a)

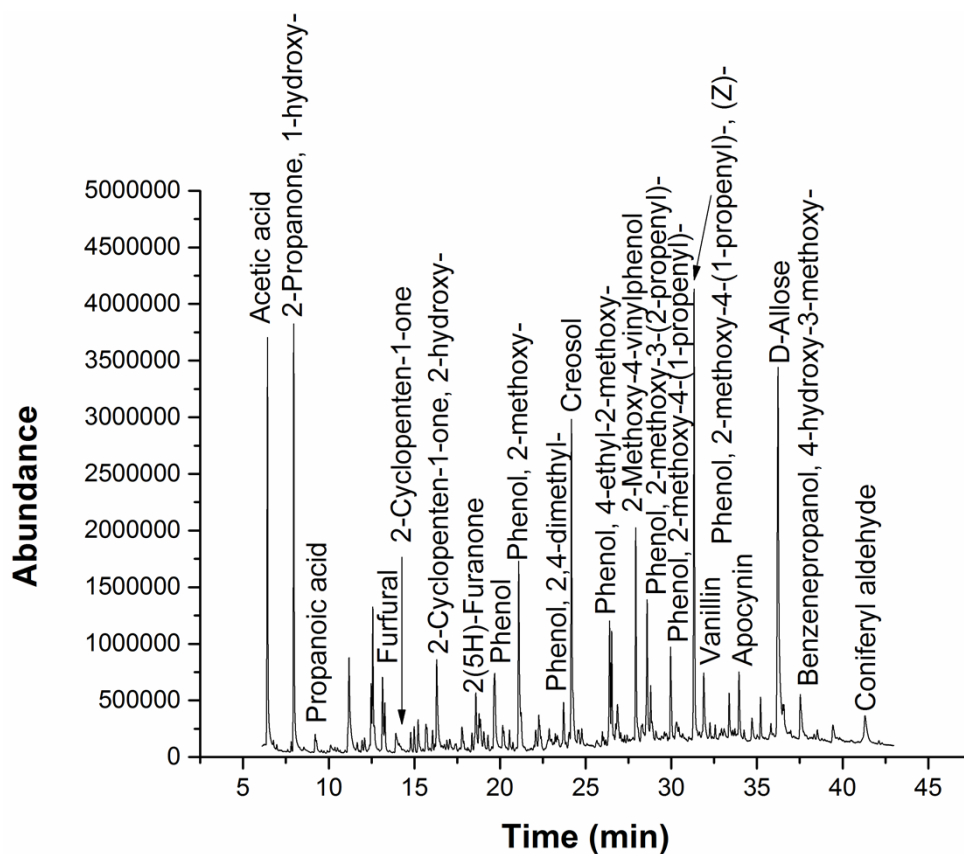

(b)

**Fig. S1** Pyrolysis vapors analysis of sawdust pyrolyzed under 500 °C. (a) permanent gases, (b) condensable chemicals.

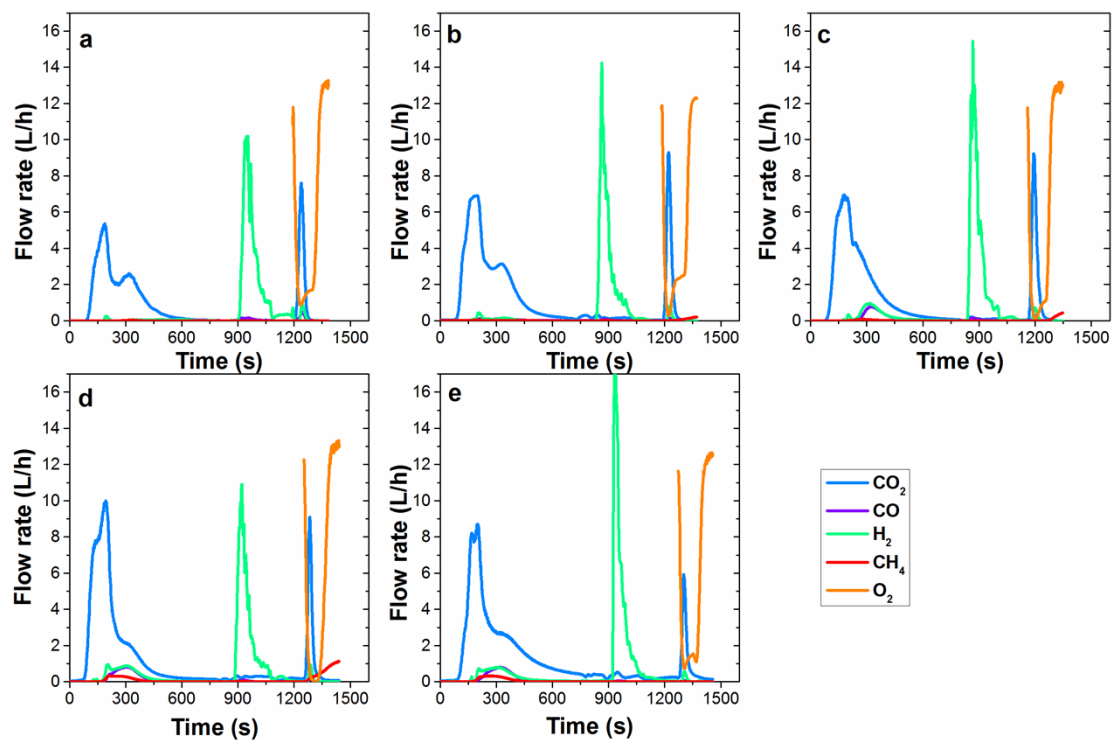

**Fig. S2** Effluent gases profile of CLHG process with pyrolysis vapors derived under different pyrolysis temperature. a. 450 °C, b. 500 °C, c. 550 °C, d. 600 °C, e. 650 °C.

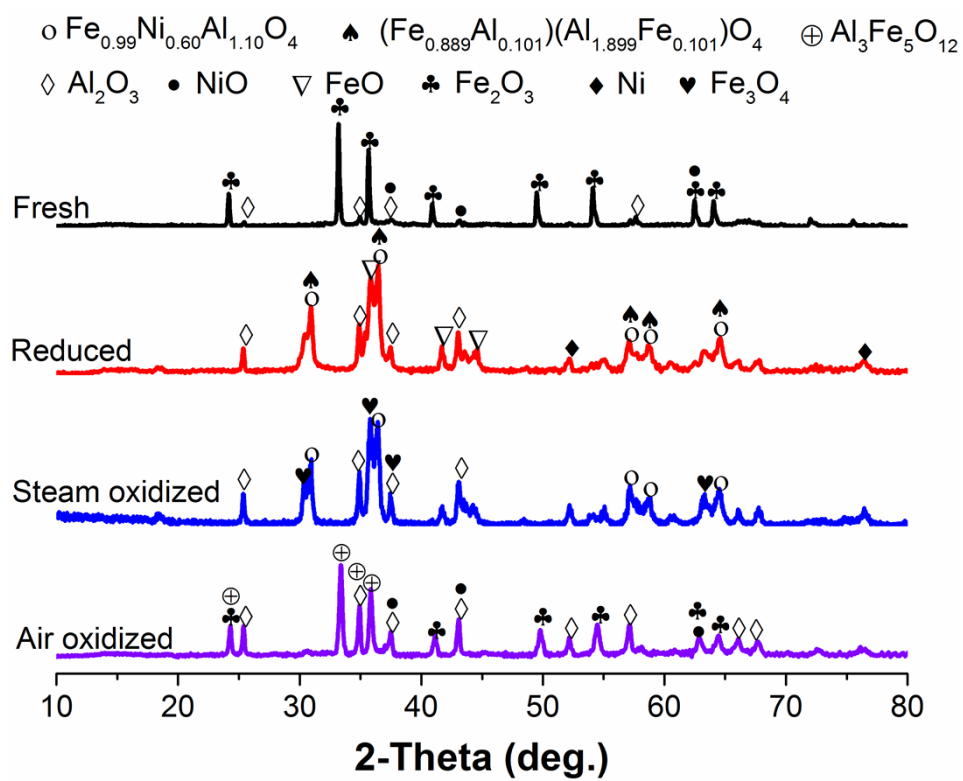

**Fig. S3** XRD pattern of OC in different CLHG stage.
